# Supplementary material for: Consequences of herbal mixture supplementation on milk performance, ruminal fermentation, and bacterial diversity in water buffaloes
Source: PeerJ. 2021 May 14;9:e11241. doi: 10.7717/peerj.11241 (PMC8127954; doi:10.7717/peerj.11241)
Supplement: Supplemental Information 3 [file peerj-09-11241-s003.xlsx]

## Sheet: Sheet1
Anim. No.	code No.	Treatment	rep	C2	C3	iso C4	C4	isoC5	C5	A/P ratio	TVFAs	pH	NH3	MCP
6963	24	HM20	1	21.2382	14.9259	0.742383	6.29878	0.883326	0.682601	1.42291	44.7712	6.47	9.42424	38.6567
4412	25	HM20	2	16.8224	10.5697	0.736601	5.26886	0.865147	0.615341	1.59156	34.878	6.79	7.42424	33.1679
4632	26	HM20	3	16.6948	8.56528	0.898588	6.00618	1.10122	0.593034	1.94912	33.8591	6.54	11.5169	30.9739
1073	27	HM20	4	16.8742	12.3557	0.967334	4.6929	1.32319	0.918795	1.3657	37.1321	6.48	10.5668	42.9104
4269	28	HM30	1	19.0078	11.9043	0.875875	6.48051	1.12562	0.856603	1.59671	40.2507	6.46	11.4777	36.2201
1322	29	HM30	2	17.6648	10.3992	0.906607	5.99976	1.19485	0.658966	1.69867	36.8242	6.81	10.9697	55.1903
1156	30	HM30	3	12.0397	6.2189	0.65459	3.53582	0.672778	0.328527	1.93599	23.4504	7.03	8.52763	15.2575
6473	31	HM40	1	15.537	10.5538	0.570719	4.23777	0.598708	0.423891	1.47216	31.9219	6.88	13.7504	23.9216
6969	32	HM40	2	20.048	12.3047	0.857948	7.70525	1.14835	0.824698	1.6293	42.8889	6.43	13.8966	39.7724
1292	33	HM40	3	18.3232	11.9397	1.01148	6.00524	1.36497	0.797697	1.53464	39.4422	6.66	14.7219	35.403
1352	34	Control	1	15.5033	10.3984	0.751742	4.36167	0.847434	0.479965	1.49092	32.3425	6.87	7.35472	26.7276
1254	35	Control	2	19.1189	10.402	0.718895	6.82351	0.80871	0.571042	1.838	38.443	6.72	6.41711	32.8918
1340	36	Control	3	17.3898	11.6342	0.989357	5.98448	1.41692	0.826431	1.49471	38.2413	6.46	10.9447	35.3134
6949	37	Control	4	14.3872	7.91458	0.792581	4.64292	0.955085	0.500152	1.81781	29.1925	6.69	12.7861	33.8993
