# Supplementary material for: Consequences of herbal mixture supplementation on milk performance, ruminal fermentation, and bacterial diversity in water buffaloes
Source: PeerJ. 2021 May 14;9:e11241. doi: 10.7717/peerj.11241 (PMC8127954; doi:10.7717/peerj.11241)
Supplement: Supplemental Information 4 [file peerj-09-11241-s004.xlsx]

## Sheet: Sheet1
Treatment	week	Replicate	C4 :0	C6 :0	C8 :0	C10:0	C12:0	C14:0	C14:1	C16:0	C16:1	C17 :0	C18 :0	C18:1	C18:2n6	C18:3	C18:3n3	TSFA	TUSFA	SCFA	MCFA	LCFA
HM20	1	1	0.77	0.76	0.56	1.19	1.94	9.3	1.65	29.11	3.06	0.44	12.45	34.53	1.94	1.84	0.46	56.52	43.48	3.3	45.1	51.7
HM20	1	2	1.06	0.96	0.61	1.31	1.93	10.64	0.96	31.59	2.17	0.34	15.51	29.77	1.45	1.3	0.42	63.95	36.05	3.9	47.3	48.8
HM20	1	3	0.94	1.13	0.91	2.14	3.1	12.48	1.38	31.68	2.02	0.31	12.9	27.43	1.57	1.57	0.43	65.58	34.42	5.1	50.7	44.2
HM20	1	4	1.1	1.02	0.69	1.53	2.24	10.93	0.96	29.99	1.47	0.33	18.06	28.11	1.86	1.21	0.49	65.9	34.1	4.3	45.6	50.1
HM20	2	1	1.15	1	0.63	1.32	2.1	10.71	2.2	33.35	3.44	0.39	7.33	31.95	1.69	1.72	1.02	57.98	42.02	4.1	51.8	44.1
HM20	2	2	1.67	1.45	0.91	1.92	2.7	13.5	1.31	36.28	1.48	0.51	9.54	25.67	1.41	1.01	0.64	68.48	31.52	6	55.3	38.8
HM20	2	3	0.94	1.05	0.8	1.89	2.78	11.69	1.43	31.78	1.71	0.53	12.39	29.62	1.38	1.08	0.92	63.86	36.14	4.7	49.4	45.9
HM20	2	4	1.23	1.12	0.79	1.58	2.42	11.33	1.17	34.42	1.59	0.47	12.54	28.33	1.73	1.27	.	65.9	34.1	4.7	50.9	44.3
HM20	3	1	0.45	0.69	0.43	0.91	1.54	8.58	1.73	28.58	3.41	0.48	14.41	34.13	1.6	2.6	0.46	56.07	43.93	2.5	43.8	53.7
HM20	3	2	0.64	0.99	0.7	1.62	2.38	10.73	1.14	30.42	2.08	0.28	18.93	26.17	1.65	1.77	0.5	66.69	33.31	4	46.8	49.3
HM20	3	3	0.75	1.01	0.62	1.33	1.95	10.09	0.99	29.54	2.01	0.26	19.81	27.74	1.67	1.72	0.5	65.37	34.63	3.7	44.6	51.7
HM20	3	4	0.71	1.11	0.77	1.69	2.41	11.77	1.12	31.01	1.8	0.27	17.33	26.71	1.42	1.49	0.39	67.07	32.93	4.3	48.1	47.6
HM20	4	1	.	0.75	0.52	1.08	1.79	9.35	1.91	30.34	3.71	0.37	11.1	34.55	1.76	2.4	0.38	55.29	44.71	2.4	47.1	50.6
HM20	4	2	1.12	1.08	0.75	1.65	2.41	12.37	1.14	34.4	1.73	0.53	13.12	26.79	1.29	1.62	.	67.44	32.56	4.6	52.1	43.4
HM20	4	3	0.86	1.04	0.86	2.03	2.98	11.25	1.41	29.34	2.32	0.25	12.7	30.78	1.71	2.09	0.38	61.32	38.68	4.8	47.3	47.9
HM20	4	4	1.16	1.07	0.72	1.55	2.31	11.17	1.06	31.56	1.81	0.24	15.49	28.2	1.68	1.56	0.42	65.27	34.73	4.5	47.9	47.6
HM20	5	1	0.58	0.66	0.46	1.02	1.7	8.7	1.6	30.83	3.21	0.36	12.65	34.31	1.56	1.98	0.39	56.96	43.04	2.7	46	51.3
HM20	5	2	0.88	1.05	0.77	1.81	2.63	12.14	1.06	34.01	2.1	0.25	14.82	25.59	1.23	1.31	0.35	68.37	31.63	4.5	51.9	43.6
HM20	5	3	0.75	0.91	0.66	1.57	2.25	10	1.14	30.5	2.17	0.31	15.25	30.93	1.3	1.82	0.43	62.21	37.79	3.9	46.1	50
HM20	5	4	0.94	1.02	0.7	1.58	2.32	10.83	0.94	31.45	1.63	0.29	16.38	28.57	1.55	1.38	0.42	65.51	34.49	4.2	47.2	48.6
HM20	6	1	0.53	0.6	0.4	0.88	1.53	8.11	1.7	29.03	3.2	0.39	11.37	37.39	1.95	2.46	0.45	52.84	47.16	2.4	43.6	54
HM20	6	2	0.77	0.9	0.6	1.38	2.05	11.27	1.03	33.58	1.82	0.27	14.93	28.36	1.25	1.39	0.4	65.75	34.25	3.7	49.8	46.6
HM20	6	3	0.66	0.81	0.57	1.32	2.02	9.69	1.25	30.92	2.4	0.28	13.1	32.87	1.52	2.14	0.45	59.36	40.64	3.4	46.3	50.4
HM20	6	4	0.81	0.87	0.56	1.28	1.95	10	0.92	30.91	1.81	0.23	17.67	29.46	1.52	1.54	0.47	64.29	35.71	3.5	45.6	50.9
HM20	7	1	0.5	0.61	0.39	0.83	1.43	8.11	1.79	29.11	3.54	0.42	11.09	37.15	1.78	2.76	0.48	52.5	47.5	2.3	44	53.7
HM20	7	2	0.76	0.99	0.67	1.51	2.19	11.41	1.14	33.62	2.27	0.25	13.26	28.55	1.36	1.61	0.4	64.67	35.33	3.9	50.6	45.4
HM20	7	3	0.66	0.96	0.72	1.66	2.43	10.64	1.39	30.44	2.51	0.28	12.07	32.01	1.65	2.15	0.44	59.87	40.13	4	47.4	48.6
HM20	7	4	0.77	0.97	0.65	1.46	2.15	9.68	1.11	29.51	1.61	0.23	17.26	30.92	1.69	1.48	0.49	62.68	37.32	3.9	44.1	52.1
HM30	1	1	0.84	0.95	0.72	1.7	2.49	11.4	1.36	31.58	2.28	0.31	12.97	29.73	1.36	1.9	0.42	62.95	37.05	4.2	49.1	46.7
HM30	1	2	1.06	1.02	0.73	1.53	2.25	11.31	1.05	31.5	1.93	0.29	15.35	28.92	1.45	1.24	0.37	65.04	34.96	4.3	48	47.6
HM30	1	3	1.18	1.05	0.7	1.55	2.24	10.52	0.9	31.94	1.52	0.28	17.43	27.13	1.7	1.38	0.48	66.88	33.12	4.5	47.1	48.4
HM30	1	4	0.93	0.88	0.56	1.22	1.81	9.78	1.11	30.17	1.88	0.3	16.34	31.39	1.43	1.73	0.47	61.99	38.01	3.6	44.8	51.7
HM30	2	1	1.08	1.15	0.81	1.82	2.66	11.9	1.51	35.28	2.34	0.49	8.89	28.51	1.4	1.42	0.74	64.07	35.93	4.9	53.7	41.5
HM30	2	2	1.21	1.31	0.9	2.06	2.98	14.14	1.37	37.26	1.81	0.56	10.46	23.01	1.41	0.94	0.58	70.88	29.12	5.5	57.6	37
HM30	2	3	1.08	1.06	0.69	1.58	2.35	11.21	1.45	34.78	2.17	0.45	14.11	25.97	1.86	1.21	.	67.33	32.67	4.4	52	43.6
HM30	2	4	0.83	0.79	0.55	1.13	1.78	9.34	1.43	32.45	2.38	0.41	12	33.25	1.63	2.01	.	59.29	40.71	3.3	47.4	49.3
HM30	3	1	0.5	0.71	0.41	0.88	1.4	7.69	1.25	27.33	2.49	0.33	17.08	35.97	1.42	2.06	0.5	56.32	43.68	2.5	40.2	57.4
HM30	3	2	0.85	1.25	0.8	1.75	2.46	12.39	1.24	35.58	2.49	0.28	15.56	21.99	1.52	1.44	0.4	70.92	29.08	4.7	54.2	41.2
HM30	3	3	0.6	1.08	0.82	1.85	2.67	10.87	1.36	30.32	2.62	0.28	14.32	29.25	1.47	2.09	0.39	62.81	37.19	4.4	47.8	47.8
HM30	3	4	0.59	0.79	0.48	1.06	1.59	8.53	0.98	29.28	2.2	0.29	21.7	28.5	1.73	1.73	0.56	64.32	35.68	2.9	42.6	54.5
HM30	4	1	0.88	1	0.83	2	2.91	11.15	1.38	30.25	1.97	0.27	11.43	31.78	1.54	2.3	0.32	60.71	39.29	4.7	47.7	47.6
HM30	4	2	1.23	1.16	0.78	1.66	2.4	11.99	1.12	34.61	1.98	0.25	12.22	26.86	1.43	1.96	0.36	66.29	33.71	4.8	52.1	43.1
HM30	4	3	1.1	0.82	0.53	1.12	1.68	8.19	0.96	28.65	1.57	0.29	20.39	30.68	1.76	1.74	0.53	62.77	37.23	3.6	41.1	55.4
HM30	4	4	0.85	0.84	0.6	1.36	2.05	9.51	1.27	29.27	1.7	0.34	14.36	33.97	1.52	1.96	0.4	59.18	40.82	3.7	43.8	52.6
HM30	5	1	0.79	0.97	0.73	1.74	2.57	11.14	1.45	33.42	2.8	0.29	10.43	29.94	1.26	2.12	0.34	62.09	37.91	4.2	51.4	44.4
HM30	5	2	0.93	1.13	0.79	1.85	2.66	12.45	1.06	33.94	2.28	0.32	14.35	25.46	1.32	1.11	0.36	68.42	31.58	4.7	52.4	42.9
HM30	5	3	0.72	0.66	0.44	1.02	1.67	7.41	1	27.68	1.53	0.34	17.71	35.67	1.68	1.96	0.51	57.65	42.35	2.8	39.3	57.9
HM30	5	4	0.65	0.74	0.5	1.11	1.74	8.86	1.41	30.08	2.27	0.34	13.68	34.43	1.32	2.43	0.42	57.71	42.29	3	44.4	52.6
HM30	6	1	0.69	0.92	0.72	1.75	2.62	10.69	1.42	31.26	2.6	0.3	11.64	31.69	1.37	1.93	0.39	60.6	39.4	4.1	48.6	47.3
HM30	6	2	0.81	0.87	0.55	1.25	1.92	10.71	1.05	34.32	2.4	0.26	13.44	28.99	1.31	1.71	0.4	64.14	35.86	3.5	50.4	46.1
HM30	6	3	1.72	0.59	0.37	0.86	1.45	7.61	1.28	28.2	2.29	0.36	15.74	35.25	1.56	2.17	0.55	56.9	43.1	3.5	40.8	55.6
HM30	7	1	0.62	0.98	0.76	1.78	2.57	10.38	1.3	30.62	2.58	0.27	11.57	32.54	1.51	2.13	0.4	59.55	40.45	4.1	47.5	48.4
HM30	7	2	0.7	0.96	0.61	1.33	1.99	10.72	1.02	32.58	2.18	0.27	13.74	29.94	1.45	2.06	0.44	62.91	37.09	3.6	48.5	47.9
HM30	7	3	0.48	0.55	0.31	0.7	1.21	6.88	1.37	28.06	2.82	0.39	14.3	38.43	1.64	2.36	0.5	52.88	47.12	2	40.3	57.6
HM40	1	4	0.83	1.04	0.88	2.18	3.16	11.86	1.38	30.08	2.45	0.29	14.65	27.57	1.71	1.44	0.49	64.96	35.04	4.9	48.9	46.2
HM40	1	1	1.22	1.21	0.91	1.96	2.77	11.45	1.24	31.47	2.07	0.35	16.01	26.81	1.1	0.39	1.04	67.35	32.65	5.3	49	45.7
HM40	1	2	0.99	0.76	0.51	1.13	1.82	8.57	0.91	29.17	1.53	0.57	19.52	31.74	1.57	0.92	0.28	63.05	36.95	3.4	42	54.6
HM40	1	3	1	0.88	0.6	1.29	1.95	9.43	0.94	28.61	1.69	0.28	18.27	31.16	1.59	1.83	0.47	62.32	37.68	3.8	42.6	53.6
HM40	2	1	0.78	1.1	0.91	2.14	3.16	12.98	1.8	34.55	3.05	0.53	8.35	26.84	1.05	2.13	0.64	64.48	35.52	4.9	55.5	39.5
HM40	2	2	1.19	1.19	0.88	1.94	2.78	11.77	1.41	34.82	1.85	0.55	12.08	26.64	1.18	0.97	0.75	67.21	32.79	5.2	52.6	42.2
HM40	2	3	1.36	1.18	0.78	1.57	2.34	12.3	1.08	38.04	1.65	0.68	12.25	23.98	1.71	0.67	0.44	70.48	29.52	4.9	55.4	39.7
HM40	2	4	1.15	1.06	0.76	1.62	2.43	11.21	1.04	32.21	1.37	0.67	15.23	28.16	1.82	1.25	.	66.36	33.64	4.6	48.3	47.1
HM40	3	1	0.78	1.17	0.84	1.91	2.62	10.48	1.2	30.01	2.27	0.29	18	27.35	1.2	1.45	0.43	66.1	33.9	4.7	46.6	48.7
HM40	3	2	0.83	1.04	0.64	1.36	2.03	10.7	0.87	34.14	1.68	0.25	19.89	23.51	1.45	1.16	0.47	70.87	29.13	3.9	49.4	46.7
HM40	3	3	0.72	0.75	0.51	1.07	1.69	7.9	0.9	26.11	1.69	0.26	24.38	29.97	1.57	1.94	0.53	63.4	36.6	3.1	38.3	58.7
HM40	3	4	0.44	0.95	0.76	1.88	2.77	10.84	1.44	28.53	2.46	0.32	17.31	28.27	1.73	1.78	0.51	63.81	36.19	4	46	49.9
HM40	4	1	0.87	1.05	0.89	2.22	3.2	11.82	1.5	29.65	2.22	0.29	13.55	28.89	1.71	1.7	0.44	63.53	36.47	5	48.4	46.6
HM40	4	2	1.27	1.21	0.86	1.87	2.58	10.55	1.17	29.88	1.92	0.28	16.05	29.23	1.31	1.43	0.39	64.55	35.45	5.2	46.1	48.7
HM40	4	3	1.29	1.23	0.84	1.85	2.62	12.25	0.85	34.45	1.33	0.24	16.51	23.61	1.45	1.08	0.39	71.3	28.7	5.2	51.5	43.3
HM40	4	4	0.97	0.9	0.63	1.43	2.09	9.1	1.09	26.89	1.39	0.24	18.51	32.62	1.61	2.06	0.46	60.76	39.24	3.9	40.6	55.5
HM40	5	1	0.72	0.87	0.64	1.56	2.3	10.34	1.11	31.04	1.86	0.32	17.05	28.69	1.58	1.42	0.5	64.85	35.15	3.8	46.7	49.6
HM40	5	2	0.9	1.09	0.81	1.87	2.61	10.42	1.13	31.02	2.44	0.31	15.88	28.61	1.2	1.29	0.42	64.91	35.09	4.7	47.6	47.7
HM40	5	3	0.98	1.03	0.7	1.58	2.31	10.6	0.85	31.74	1.44	0.26	17.66	27.64	1.44	1.35	0.43	66.85	33.15	4.3	46.9	48.8
HM40	5	4	0.74	0.68	0.45	1.03	1.69	7.42	1	27.53	1.56	0.33	17.58	35.82	1.67	1.97	0.51	57.46	42.54	2.9	39.2	57.9
HM40	6	1	0.48	0.81	0.67	1.68	2.51	10.19	1.43	29.09	2.45	0.3	13.9	32.04	1.92	2.01	0.53	59.63	40.37	3.6	45.7	50.7
HM40	6	2	0.81	0.9	0.65	1.44	2.09	9.23	1.13	30.25	2.15	0.3	15.65	32.09	1.2	1.66	0.46	61.31	38.69	3.8	44.9	51.4
HM40	6	3	0.75	0.76	0.5	1.07	1.67	8.61	0.77	30.59	1.57	0.24	20.47	30	1.25	1.25	0.5	64.66	35.34	3.1	43.2	53.7
HM40	7	1	0.52	0.83	0.63	1.54	2.34	10.43	1.46	28.91	2.45	0.3	12.48	33.26	2.11	2.19	0.54	57.98	42.02	3.5	45.6	50.9
HM40	7	2	0.73	0.92	0.67	1.56	2.24	9.3	1.14	29.54	2.31	0.28	15.37	32.27	1.54	1.67	0.45	60.61	39.39	3.9	44.5	51.6
HM40	7	3	0.73	0.79	0.51	1.1	1.7	8.47	0.86	29.79	1.69	0.24	18.6	32.01	1.54	1.49	0.51	61.92	38.58	3.1	42.5	54.4
Control	1	1	0.79	0.94	0.67	1.54	2.28	10.53	1.24	30.84	2.34	0.38	16.04	29.56	1.27	1.13	0.45	64.01	35.99	3.9	47.2	48.8
Control	1	2	0.95	0.96	0.65	1.47	2.26	11.95	1	35.48	1.94	0.33	14.75	25.42	1.36	1.1	0.39	68.8	31.2	4	52.6	43.4
Control	1	3	0.91	0.99	0.66	1.46	2.14	10.04	0.82	29.21	1.63	0.37	19.24	29.36	1.54	1.19	0.44	65.01	34.99	4	43.8	52.1
Control	1	4	0.96	0.8	0.52	1.17	1.82	10.14	1.02	33.28	1.87	0.31	16.15	28.75	1.37	1.36	0.5	65.13	34.87	3.5	48.1	48.4
Control	2	1	.	0.96	0.65	1.38	2.03	9.4	1.22	30.1	2.38	0.31	16.36	31.73	1.28	1.83	0.39	61.18	38.82	3	45.1	51.9
Control	2	2	0.39	1.2	0.82	1.77	2.61	12.54	1.15	36.4	2.08	0.31	13.27	24.51	1.28	1.31	0.36	69.31	30.69	4.2	54.8	41
Control	2	3	0.38	1.25	0.8	1.66	2.32	10.86	0.95	30.91	1.81	0.28	17.05	28.39	1.47	1.47	0.38	65.52	34.48	4.1	46.9	49
Control	2	4	.	0.86	0.52	1.08	1.69	9.04	1.01	31.25	1.51	0.3	16.95	32.01	1.33	2.05	0.41	61.68	38.32	2.5	44.5	53.1
Control	3	1	0.86	1.11	0.73	1.59	2.36	11.64	1.05	35.24	1.95	0.27	13.75	26.21	1.42	1.37	0.44	67.55	32.45	4.3	52.2	43.5
Control	3	2	0.8	1.22	0.8	1.73	2.38	10.68	0.95	29.65	1.87	0.25	18.17	28.01	1.67	1.33	0.49	65.67	34.33	4.6	45.5	49.9
Control	3	3	0.66	0.93	0.61	1.34	1.99	9.48	1.19	30.19	2.38	0.3	15.01	32.34	1.36	1.73	0.47	60.52	39.48	3.5	45.2	51.2
Control	3	4	0.52	0.88	0.62	1.37	2.03	9.11	0.86	30.06	1.76	0.33	18.14	30.85	1.45	1.48	0.54	63.05	36.95	3.4	43.8	52.8
Control	4	1	1.13	0.99	0.66	1.42	2.09	9.08	1.13	29.24	1.76	0.3	16.2	32.55	1.2	1.85	0.42	61.09	38.91	4.2	43.3	52.5
Control	4	2	1.45	1.23	0.82	1.76	2.57	12.56	1.1	37.43	1.7	0.27	12.06	24.09	1.37	1.3	0.3	70.14	29.86	5.3	55.4	39.4
Control	4	3	1.27	1.31	0.92	1.98	2.73	11.3	1.02	30.69	1.51	0.24	15.58	27.8	1.72	1.53	0.4	66.02	33.98	5.5	47.3	47.3
Control	4	4	1.06	0.86	0.56	1.19	1.78	8.82	1.04	29.89	1.67	0.28	16.38	32.21	1.63	2.15	0.49	60.82	39.18	3.7	43.2	53.1
Control	5	1	0.75	0.87	0.64	1.5	2.22	8.86	1.17	28.18	2.35	0.33	16.26	33.46	1.21	1.75	0.43	59.63	40.37	3.8	42.8	53.4
Control	5	2	0.84	1.05	0.71	1.61	2.41	12.54	1.03	40	2.14	.	13.91	21.36	1.2	1.19	.	73.07	26.93	4.2	58.1	37.7
Control	5	3	0.8	1.04	0.73	1.76	2.45	11.03	0.95	32.84	1.84	0.26	15.92	27.12	1.54	1.32	0.41	66.83	33.17	4.3	49.1	46.6
Control	5	4	0.82	0.74	0.49	1.09	1.72	8.58	1.01	30.4	1.8	0.39	19.82	29.83	1.43	1.33	0.56	64.05	35.95	3.1	43.5	53.4
Control	6	1	0.65	0.69	0.45	0.99	1.56	7.83	1.19	28.63	2.27	0.36	14.77	36.32	1.37	2.44	0.49	55.93	44.07	2.8	41.5	55.8
Control	6	2	1.01	0.93	0.62	1.35	2.07	11.54	1.06	38.53	2.2	0.28	12.42	25	1.2	1.39	0.42	68.74	31.26	3.9	55.4	40.7
Control	6	3	0.92	1.02	0.67	1.45	2.1	10.78	1.05	33.56	2.34	0.22	15.14	27.6	1.3	1.45	0.39	65.86	34.14	4.1	49.8	46.1
Control	6	4	0.77	0.75	0.45	1	1.56	8.42	0.92	30.62	1.82	0.27	16.16	33.41	1.41	1.94	0.5	60	40	3	43.3	53.7
Control	7	1	0.6	0.78	0.55	1.26	1.95	8.66	1.26	28.69	2.38	0.37	13.9	35.23	1.43	2.43	0.5	56.76	43.24	3.2	42.9	53.9
Control	7	2	0.79	0.92	0.57	1.3	2	11.62	1.06	37.65	2.21	0.31	12.88	25.51	1.37	1.36	0.44	68.04	31.96	3.6	54.5	41.9
Control	7	3	0.78	0.99	0.66	1.51	2.18	9.86	0.95	30.81	1.7	0.22	17.45	28.95	1.96	1.52	0.49	64.44	35.56	3.9	45.5	50.6
Control	7	4	0.71	0.61	0.36	0.77	1.27	7.33	0.91	30.08	1.84	0.25	16.01	35.35	1.48	2.51	0.53	57.39	42.61	2.5	41.4	56.1
