# Supplementary material for: Consequences of herbal mixture supplementation on milk performance, ruminal fermentation, and bacterial diversity in water buffaloes
Source: PeerJ. 2021 May 14;9:e11241. doi: 10.7717/peerj.11241 (PMC8127954; doi:10.7717/peerj.11241)
Supplement: Supplemental Information 5 [file peerj-09-11241-s005.xlsx]

## Sheet: Sheet1
Week	Replicate	Treatment	Daily Milk Yield (Kg/d)	FCM (Kg/d)	ECM (Kg/d)	Protein (%)	Fat (%)	Total Solids (%)	Solid Not Fat (%)	Lactose (%)	Protein Yield (Kg/d)	Fat Yield (Kg/d)
1	1	Control	5.57	10.52	11.03	5.11	9.93	21.6	10.81	5.52	0.285	0.553
1	2	Control	8.58	12.09	13.04	4.47	6.73	17.46	10.29	5.33	0.384	0.577
1	3	Control	8.34	12.94	13.94	4.87	7.67	18.73	10.68	5.26	0.406	0.64
1	4	Control	3.9	6.46	6.83	4.7	8.38	19.3	10.39	5.39	0.183	0.327
2	1	Control	6.16	7.19	8.42	5.25	5.12	16.77	11.06	5.5	0.323	0.315
2	2	Control	8.38	12.15	13.08	4.55	7	17.84	10.28	5.26	0.381	0.587
2	3	Control	8.28	12.95	13.93	4.87	7.77	19.06	10.65	5.23	0.403	0.643
2	4	Control	4.79	7.95	8.51	5.03	8.41	20.01	10.78	5.34	0.24	0.402
3	1	Control	5.91	9.85	10.58	5.14	8.45	20.2	10.77	5.45	0.303	0.499
3	2	Control	8.31	11.16	12.34	4.78	6.29	17.42	10.58	5.26	0.397	0.522
3	3	Control	8.47	13.9	14.94	5.08	8.27	19.71	10.71	5.15	0.43	0.701
3	4	Control	6.48	11.07	12.01	5.52	8.73	20.76	10.98	5.17	0.358	0.565
4	1	Control	5.17	10.02	10.67	5.69	10.25	22.69	11.11	5.23	0.294	0.53
4	2	Control	8.74	12.52	13.45	4.46	6.88	17.63	10.2	5.34	0.39	0.601
4	3	Control	8.99	14.26	15.55	5.27	7.92	19.5	10.87	5.14	0.473	0.711
4	4	Control	4.84	7.36	8.06	5.15	7.48	19.26	11.07	5.54	0.249	0.362
5	1	Control	4.82	4.5	4.8	2.89	3.56	9.66	5.6	2.54	0.139	0.172
5	2	Control	8.96	13.48	14.18	4.21	7.36	17.75	9.77	5.18	0.377	0.659
5	3	Control	8.74	14	14.98	4.85	8.02	19.1	10.36	5.28	0.424	0.701
5	4	Control	5.66	9.64	10.24	4.94	8.69	20.29	10.75	5.39	0.28	0.492
6	1	Control	4.91	5.18	5.3	2.6	4.37	10.12	5.19	2.61	0.128	0.214
6	2	Control	8.47	12.69	13.48	4.4	7.32	17.9	9.97	5.29	0.373	0.62
6	3	Control	8.96	9.1	9.39	2.63	4.11	9.94	5.41	2.61	0.235	0.368
6	4	Control	4.91	8.64	9.09	4.89	9.07	20.55	10.6	5.54	0.24	0.445
7	1	Control	3.89	4.61	4.67	2.71	5.25	11.09	5.15	2.47	0.105	0.204
7	2	Control	7.06	10.7	11.28	4.27	7.44	17.93	9.9	5.43	0.301	0.525
7	3	Control	7.64	13.64	14.51	5.23	9.25	20.97	10.81	5.3	0.399	0.706
7	4	Control	3.88	6.43	6.97	5.31	8.39	20.28	11.03	5.38	0.206	0.325
8	1	Control	3.82	3.73	3.74	2.13	3.86	9.07	4.91	2.71	0.081	0.147
8	2	Control	8.03	12.19	13.2	4.89	7.45	18.62	10.47	5.28	0.393	0.598
8	3	Control	8.43	10.17	10.13	2.49	5.38	11.22	5.32	2.75	0.209	0.453
8	4	Control	4.88	8.09	8.76	5.31	8.39	20.28	11.03	5.38	0.259	0.409
1	1	HM20	6.89	14.97	16.01	6.48	11.82	24.41	11.27	4.53	0.446	0.814
1	2	HM20	10.51	16.61	17.66	4.65	7.87	18.91	10.39	5.47	0.488	0.827
1	3	HM20	7.79	14.43	15.08	4.93	9.68	21.08	10.52	5.3	0.384	0.754
1	4	HM20	8.29	16.55	17.15	5.05	10.64	22.21	10.39	5.16	0.419	0.882
2	1	HM20	8.15	19.26	20.18	6.3	13.09	25.66	10.73	4.6	0.513	1.067
2	2	HM20	11.22	17.69	18.97	4.83	7.85	19.18	10.47	5.41	0.542	0.88
2	3	HM20	8.19	14.8	15.73	5.27	9.39	21.14	10.64	5.15	0.431	0.769
2	4	HM20	8.72	12.57	13.52	4.5	6.94	17.8	10.2	5.44	0.392	0.605
3	1	HM20	8.38	18.16	19.35	6.34	11.78	24.04	10.74	4.48	0.531	0.987
3	2	HM20	11.11	18.69	19.99	5.08	8.55	20.22	10.73	5.4	0.564	0.95
3	3	HM20	7.96	13.82	14.66	5.02	8.91	20.29	10.46	5.18	0.399	0.709
3	4	HM20	9.16	14.52	15.4	4.6	7.9	18.89	10.18	5.4	0.422	0.724
4	1	HM20	8.7	18.97	20.4	6.68	11.87	24.62	11.14	4.47	0.581	1.033
4	2	HM20	10.67	18.8	19.89	5.03	9.08	20.68	10.64	5.44	0.536	0.968
4	3	HM20	7.98	14.87	15.77	5.35	9.76	21.59	10.61	5.16	0.427	0.779
4	4	HM20	9.79	17.4	18.07	4.58	9.19	20.3	10.16	5.48	0.448	0.899
5	1	HM20	8.29	12.44	12.77	3.66	7.34	14.04	5.78	2.13	0.303	0.608
5	2	HM20	9.99	15.95	17.17	4.98	7.98	19.38	10.54	5.3	0.497	0.797
5	3	HM20	7.69	14.29	15.07	5.2	9.73	21.24	10.42	5.08	0.399	0.747
5	4	HM20	9.21	15.79	16.65	4.8	8.77	20.02	10.4	5.34	0.441	0.807
6	1	HM20	8.42	12.76	13.05	3.62	7.44	14.11	5.61	2.1	0.304	0.626
6	2	HM20	10.25	17.18	18.34	5.02	8.51	20.01	10.58	5.42	0.514	0.872
6	3	HM20	7.32	13.08	13.95	5.3	9.25	20.98	10.65	5.24	0.388	0.677
6	4	HM20	8.39	13.14	14	4.65	7.78	18.88	10.3	5.51	0.39	0.652
7	1	HM20	8.34	11.24	11.57	3.37	6.32	12.67	5.5	2.2	0.281	0.527
7	2	HM20	9.27	15.77	16.84	5.09	8.68	20.26	10.61	5.37	0.471	0.804
7	3	HM20	6.68	10.68	11.71	5.44	8	19.73	10.79	5.16	0.363	0.534
7	4	HM20	7.54	13.25	13.87	4.75	9.04	20.23	10.28	5.45	0.358	0.682
8	1	HM20	8.41	11.33	11.67	3.37	6.32	12.67	5.5	2.2	0.283	0.531
8	2	HM20	9.84	16.74	17.87	5.09	8.68	20.26	10.61	5.37	0.5	0.854
8	3	HM20	7.51	12.01	13.17	5.44	8	19.73	10.79	5.16	0.409	0.6
8	4	HM20	8.65	15.19	15.91	4.75	9.04	20.23	10.28	5.45	0.41	0.782
1	1	HM30	7.14	11.61	12.71	5.49	8.18	20	11.22	5.37	0.392	0.584
1	2	HM30	8.62	11.41	12.63	4.73	6.16	16.99	10.39	5.2	0.408	0.531
1	3	HM30	7.74	7.45	8.92	4.72	3.76	14.18	10.1	4.97	0.365	0.29
1	4	HM30	7.19	10.51	11.15	4.27	7.08	17.5	9.83	5.52	0.307	0.509
2	1	HM30	7.93	14.3	15.27	5.39	9.36	21.25	10.97	5.35	0.427	0.742
2	2	HM30	9.34	15.49	16.51	4.92	8.4	19.65	10.57	5.26	0.459	0.784
2	3	HM30	7.94	8.11	9.6	4.8	4.14	14.6	10.04	4.94	0.381	0.329
2	4	HM30	8.09	12.76	13.6	4.68	7.85	18.96	10.11	5.45	0.379	0.635
3	1	HM30	8.09	14.69	15.71	5.45	9.44	21.35	10.92	5.24	0.441	0.764
3	2	HM30	9.32	17.03	18.02	5.2	9.52	21.2	10.81	5.3	0.485	0.887
3	3	HM30	8.9	18.91	19.24	4.8	11.5	22.04	8.9	4.24	0.427	1.024
3	4	HM30	8.33	19.76	20.03	5.22	13.15	24.59	9.8	4.96	0.434	1.095
4	1	HM30	7.91	14.47	15.46	5.47	9.53	21.4	10.89	5.24	0.433	0.754
4	2	HM30	8.76	14.64	15.55	4.87	8.47	19.67	10.45	5.29	0.427	0.742
4	3	HM30	7.54	10.47	11.41	4.62	6.59	16.72	9.35	4.61	0.348	0.497
4	4	HM30	7.61	15.73	15.94	4.57	11.12	21.73	9.3	5.12	0.347	0.846
5	1	HM30	7.32	12.91	13.89	5.46	9.09	20.95	10.94	5.21	0.399	0.666
5	2	HM30	8.15	12.42	13.13	4.37	7.49	16.72	8.53	3.84	0.356	0.61
5	3	HM30	7.26	9.06	9.07	2.65	5.66	10.69	4.2	1.51	0.192	0.411
5	4	HM30	7.7	9.02	9.02	2.48	5.15	10.53	4.71	2.34	0.191	0.396
6	1	HM30	7.3	13.28	14.24	5.53	9.47	21.42	10.97	5.29	0.403	0.691
6	2	HM30	8.02	11.6	12.87	5.19	6.98	18.41	10.81	5.26	0.416	0.559
6	3	HM30	6.99	2.8	2.29	0	0	0	0	0	0	0
6	4	HM30	6.46	6.05	6.16	2.28	3.58	8.23	4.13	1.87	0.147	0.231
7	1	HM30	6.37	12.62	13.38	5.67	10.54	22.64	10.99	5.16	0.361	0.672
7	2	HM30	6.91	9.63	10.7	5.06	6.62	17.76	10.57	5.15	0.35	0.457
7	3	HM30	6.43	.	.	.	.	.	.	.	.	.
7	4	HM30	6.91	8.14	8.11	2.42	5.19	10.34	4.41	2.1	0.167	0.359
8	1	HM30	6.63	13.12	13.91	5.67	10.54	22.64	10.99	5.16	0.376	0.698
8	2	HM30	7.37	10.26	11.41	5.06	6.62	17.76	10.57	5.15	0.373	0.488
8	3	HM30	.	.	.	.	.	.	.	.	.	.
8	4	HM30	6	7.07	7.04	2.42	5.19	10.34	4.41	2.1	0.145	0.311
1	1	HM40	6.21	10.34	11.28	5.53	8.44	20.09	10.9	4.98	0.343	0.524
1	2	HM40	5.88	11.01	11.44	4.82	9.83	20.83	10.34	5.22	0.283	0.578
1	3	HM40	10	17.39	17.98	4.38	8.93	19.27	9.74	5.15	0.438	0.893
1	4	HM40	7.01	8.76	9.8	4.7	5.66	16.34	10.25	5.1	0.33	0.397
2	1	HM40	6.39	9.49	10.69	5.67	7.23	19.05	10.94	4.98	0.362	0.462
2	2	HM40	5.51	11.46	12.07	5.74	11.19	23.32	10.94	4.91	0.317	0.617
2	3	HM40	11.07	16.77	17.92	4.57	7.43	18.21	10.23	5.49	0.506	0.823
2	4	HM40	6.35	10.35	10.89	4.53	8.2	18.97	9.86	5.14	0.287	0.521
3	1	HM40	5.94	11.45	12.26	5.82	10.19	22.28	10.88	4.93	0.345	0.605
3	2	HM40	5.78	11.47	12.29	6.01	10.57	22.85	11.14	4.73	0.347	0.611
3	3	HM40	8.86	10.09	11.43	4.52	4.93	15.7	10.37	5.48	0.4	0.437
3	4	HM40	5.56	13.05	13.23	5.15	12.97	23.74	9.25	4.13	0.287	0.722
4	1	HM40	5.55	11.27	11.91	5.71	10.88	22.81	10.69	4.97	0.317	0.604
4	2	HM40	6.21	12.71	13.35	5.57	10.99	22.95	10.85	5.03	0.346	0.682
4	3	HM40	7.71	12.58	13.28	4.61	8.21	18.99	10.12	5.29	0.356	0.633
4	4	HM40	4.29	6.61	7.06	4.64	7.6	17.89	9.45	4.62	0.199	0.326
5	1	HM40	5.26	9.53	10.13	5.29	9.42	21.06	10.58	5.04	0.278	0.495
5	2	HM40	5.59	11.63	12.3	5.86	11.2	23.48	11.07	4.93	0.328	0.626
5	3	HM40	5.44	9.44	9.97	4.88	8.9	19.88	10.2	5.23	0.266	0.484
5	4	HM40	5.32	6.63	6.64	2.64	5.65	10.71	4.2	1.52	0.14	0.3
6	1	HM40	4.59	8.18	8.9	5.81	9.23	21.13	10.8	4.91	0.266	0.423
6	2	HM40	5.66	11.76	12.41	5.8	11.17	23.26	10.89	4.97	0.329	0.633
6	3	HM40	5.49	9.93	10.5	5.13	9.41	20.78	10.49	5.31	0.281	0.516
6	4	HM40	.	.	.	.	.	.	.	.	.	.
7	1	HM40	5.21	8.92	9.49	5.03	8.74	19.62	9.8	4.76	0.262	0.456
7	2	HM40	5.73	7.09	7.2	2.88	5.59	11.83	5.47	2.55	0.165	0.32
7	3	HM40	5.58	9.23	9.91	5.11	8.36	19.51	10.18	5.02	0.285	0.466
7	4	HM40	5.41	6.84	6.96	2.96	5.77	12.04	5.5	2.5	0.16	0.312
8	1	HM40	4.36	7.45	7.93	5.03	8.74	19.62	9.8	4.76	0.219	0.381
8	2	HM40	5.52	6.83	6.93	2.88	5.59	11.83	5.47	2.55	0.159	0.308
8	3	HM40	4.56	7.54	8.1	5.11	8.36	19.51	10.18	5.02	0.233	0.381
8	4	HM40	.	.	.	5.67	11.01	23.13	10.65	4.96	.	.
